# Supplementary material
Source: MDPI journal article supplement (https://www.mdpi.com/2073-4344/13/2/451)
Supplement: s1 [file s1]

Supplementary Materials

# **Biochar Derived from Palm Waste Supported Greenly Synthesized MnO<sub>2</sub> Nanoparticles as a Novel Adsorbent for Wastewater Treatment**

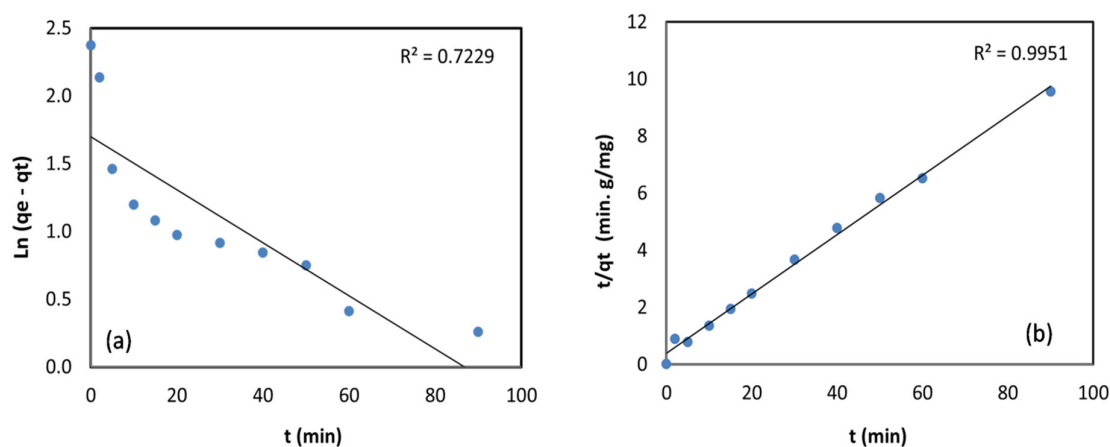

**Figure S1.** (a) pseudo-first order model, and (b) pseudo- second order model for adsorption of MO onto MnO<sub>2</sub>/PF biochar.
